# Supplementary material for: EULAR Sjogren’s Syndrome Patient Reported Index (ESSPRI) and Other Patient-Reported Outcomes in the Assessment of Glandular Dysfunction in Primary Sjögren’s Syndrome
Source: MDPI journal article supplement (doi:10.3390/life13101991), 2023-09-29
Supplement: s1 [file s1]

**Supplementary Table S1. Clinical and laboratorial characteristics of patients with primary Sjögren's syndrome according to the status of medication.**

|                             | Medication (+)<br>(N = 28) | Medication (-)<br>(N = 38) | P-value            |
|-----------------------------|----------------------------|----------------------------|--------------------|
| Age, years                  | 51.3 ± 10.5                | 47.7 ± 11.8                | 0.212 <sup>†</sup> |
| Disease duration            | 7.1 ± 3.9                  | 3.6 ± 2.4                  | <0.001             |
| ESSPRI                      | 4.2 ± 1.4                  | 4.9 ± 1.8                  | 0.088              |
| ESSPRI-Dryness              | 5.7 ± 1.4                  | 6.1 ± 2.0                  | 0.441              |
| ESSPRI-Fatigue              | 4.2 ± 2.0                  | 5.3 ± 2.1                  | 0.033              |
| ESSPRI-Pain                 | 2.7 ± 2.1                  | 3.3 ± 2.4                  | 0.290              |
| ESS                         | 5.9 ± 1.5                  | 6.4 ± 1.9                  | 0.223              |
| Ocular-VAS                  | 5.3 ± 1.6                  | 5.0 ± 2.5                  | 0.588              |
| Oral-VAS                    | 6.2 ± 2.1                  | 7.2 ± 2.1                  | 0.070              |
| OSDI                        | 43.7 ± 22.0                | 40.7 ± 23.3                | 0.918              |
| PGA                         | 5.3 ± 1.9                  | 5.7 ± 2.2                  | 0.431              |
| ESSDAI                      | 2.1 ± 2.2                  | 5.7 ± 6.0                  | 0.001              |
| ClinESSDAI                  | 1.5 ± 2.0                  | 5.6 ± 6.8                  | 0.001              |
| ClinTrialsESSDAI            | 1.5 ± 2.0                  | 3.8 ± 4.6                  | 0.006              |
| Schirmer' test positivity   | 22/28 (78.6)               | 30/37 (81.1)               | 1.000 <sup>‡</sup> |
| OSS                         | 7.2 ± 5.6                  | 6.8 ± 6.6                  | 0.829              |
| tBUT                        | 8.6 ± 3.7                  | 9.0 ± 4.5                  | 0.746              |
| Unstimulated SFR (ml/min)   | 0.03 ± 0.05                | 0.03 ± 0.06                | 0.734              |
| Stimulated SFR (ml/min)     | 0.35 ± 0.41                | 0.45 ± 0.61                | 0.461              |
| Salivary gland scintigraphy |                            |                            |                    |
| PG-UR                       | 2.4 ± 0.8                  | 2.6 ± 1.0                  | 0.373              |
| PG-EF (%)                   | 35.8 ± 23.2                | 39.4 ± 19.9                | 0.502              |
| SMG-UR                      | 2.4 ± 1.0                  | 2.4 ± 0.9                  | 0.705              |
| SMG-EF (%)                  | 19.7 ± 18.6                | 20.7 ± 17.8                | 0.843              |
| Focus score                 | 1.4 ± 1.3                  | 2.4 ± 2.0                  | 0.046              |
| ESR elevation               | 10/28 (35.7)               | 25/38 (65.8)               | 0.024 <sup>‡</sup> |
| CRP elevation               | 1/28 (3.6)                 | 4/38 (10.5)                | 0.385 <sup>‡</sup> |
| IgG elevation               | 13/26 (50.0)               | 25/38 (65.8)               | 0.300 <sup>‡</sup> |
| Anti-Ro antibody positivity | 20/28 (71.4)               | 25/37 (67.6)               | 0.792 <sup>‡</sup> |
| Anti-La antibody positivity | 8/28 (28.6)                | 11/37 (29.7)               | 1.000 <sup>‡</sup> |

Data are described as the mean ± standard deviation (SD), or number of patients (%). *P* values are obtained using the Student's *t*-test<sup>†</sup>, Mann-Whitney U test, or Chi-squared or Fisher's exact test<sup>‡</sup>. ESSPRI, EULAR Sjögren's Syndrome Patient Reported Index; ESSPRI-Dryness, dryness domain of ESSPRI; ESSPRI-Fatigue, fatigue domain of ESSPRI; ESSPRI-Pain, pain domain of ESSPRI; ESS, EULAR sicca score; Ocular-VAS, visual analogue scale for ocular dryness; Oral-VAS; VAS for oral dryness; OSDI, ocular surface disease Index; PGA, patient's global assessment; ESSDAI, EULAR Sjögren's Syndrome Disease Activity Index; ClinESSDAI, Clinical ESSDAI; ClinTrialsESSDAI, Clinical Trials ESSDAI ; OSS, ocular staining score; tBUT, tear Break-up time; SFR, salivary flow rate; PG, parotid gland; UR, uptake ratio; EF, ejection fraction; SMG, submandibular gland, ESR, erythrocyte sedimentation rate; CRP, C-reactive protein.

**Supplementary Table S2. Correlations between subjective and objective clinical disease activity indexes in patients with primary Sjögren's syndrome.**

|                | ESSDAI       |                 | ClinESSDAI   |                 |
|----------------|--------------|-----------------|--------------|-----------------|
|                | Spearman rho | <i>P</i> -value | Spearman rho | <i>P</i> -value |
| ESSPRI         | 0.371        | 0.002           | 0.412        | 0.001           |
| ESSPRI-Dryness | 0.160        | 0.198           | 0.193        | 0.121           |
| ESSPRI-Fatigue | 0.395        | 0.001           | 0.388        | 0.001           |
| ESSPRI-Pain    | 0.310        | 0.011           | 0.383        | 0.001           |
| ESS            | 0.170        | 0.172           | 0.193        | 0.120           |
| Ocular-VAS     | 0.030        | 0.814           | 0.019        | 0.877           |
| Oral-VAS       | 0.181        | 0.145           | 0.178        | 0.152           |
| OSDI           | -0.160       | 0.444           | -0.174       | 0.406           |
| PGA            | 0.231        | 0.062           | 0.245        | 0.048           |

ESSDAI, EULAR Sjögren's Syndrome Disease Activity Index; ClinESSDAI, Clinical ESSDAI; ESSPRI, EULAR Sjögren's Syndrome Patient Reported Index; ESSPRI-Dryness, dryness domain of ESSPRI; ESSPRI-Fatigue, fatigue domain of ESSPRI; ESSPRI-Pain, pain domain of ESSPRI; ESS, EULAR sicca score; Ocular-VAS, visual analogue scale for ocular dryness; Oral-VAS, VAS for oral dryness; OSDI, ocular surface disease index; PGA, patient's global assessment.

**Supplementary Table S3. Correlations between subjective and objective clinical disease activity indexes according to status of medication in primary Sjögren's syndrome.**

|                | Medication (+)<br>(N = 28) |              |                  | Medication (-)<br>(N = 38) |              |                  |
|----------------|----------------------------|--------------|------------------|----------------------------|--------------|------------------|
|                | ESSDAI                     | ClinESSDAI   | ClinTrialsESSDAI | ESSDAI                     | ClinESSDAI   | ClinTrialsESSDAI |
|                | Spearman rho               | Spearman rho | Spearman rho     | Spearman rho               | Spearman rho | Spearman rho     |
| ESSPRI         | 0.173                      | 0.211        | 0.211            | 0.464**                    | 0.496**      | 0.663**          |
| ESSPRI-Dryness | 0.250                      | 0.332        | 0.322            | 0.026                      | 0.025        | 0.207            |
| ESSPRI-Fatigue | 0.016                      | 0.002        | 0.002            | 0.548**                    | 0.516**      | 0.668**          |
| ESSPRI-Pain    | 0.020                      | 0.026        | 0.026            | 0.483**                    | 0.563**      | 0.673**          |
| ESS            | 0.302                      | 0.361        | 0.361            | -0.014                     | -0.026       | 0.149            |
| Ocular-VAS     | -0.015                     | 0.122        | 0.122            | -0.035                     | -0.025       | 0.172            |
| Oral-VAS       | 0.305                      | 0.323        | 0.323            | -0.022                     | -0.058       | 0.107            |
| OSDI           | -0.048                     | -0.152       | -0.152           | -0.206                     | -0.233       | -0.233           |
| PGA            | -0.091                     | -0.050       | -0.050           | 0.405*                     | 0.388*       | 0.518**          |

ESSDAI, EULAR Sjögren's Syndrome Disease Activity Index; ClinESSDAI, Clinical ESSDAI; ClinTrialsESSDAI, Clinical Trials ESSDAI; ESSPRI, EULAR Sjögren's Syndrome Patient Reported Index; ESSPRI-Dryness, dryness domain of ESSPRI; ESSPRI-Fatigue, fatigue domain of ESSPRI; ESSPRI-Pain, pain domain of ESSPRI; ESS, EULAR sicca score; Ocular-VAS, visual analogue scale for ocular dryness; Oral-VAS, VAS for oral dryness; OSDI, ocular surface disease index; PGA, patient's global assessment. \* $P = <0.05$ , \*\* $P = <0.01$

**Supplementary Table S4. Correlations between domains of ESSPRI and other PROs or objective clinical disease activity indexes in patients with primary Sjögren's syndrome.**

|                           | ESSPRI-Dryness |                 | ESSPRI-Fatigue |                 | ESSPRI-Pain  |                 |
|---------------------------|----------------|-----------------|----------------|-----------------|--------------|-----------------|
|                           | Spearman rho   | <i>P</i> -value | Spearman rho   | <i>P</i> -value | Spearman rho | <i>P</i> -value |
| ESSPRI                    | 0.661          | <0.001          | 0.859          | <0.001          | 0.849        | <0.001          |
| ESSPRI-Dryness            |                |                 | 0.360          | 0.003           | 0.376        | 0.002           |
| ESSPRI-Fatigue            | 0.360          | 0.003           | -              | -               | 0.636        | <0.001          |
| ESSPRI-Pain               | 0.376          | 0.002           | 0.636          | <0.001          | -            | -               |
| ESS                       | 0.969          | <0.001          | 0.324          | 0.008           | 0.368        | 0.002           |
| Ocular-VAS                | 0.799          | <0.001          | 0.289          | 0.019           | 0.208        | 0.094           |
| Oral-VAS                  | 0.811          | <0.001          | 0.241          | 0.052           | 0.328        | 0.007           |
| OSDI                      | 0.272          | 0.189           | 0.011          | 0.959           | 0.040        | 0.850           |
| PGA                       | 0.690          | <0.001          | 0.527          | <0.001          | 0.409        | <0.001          |
| ESSDAI                    | 0.160          | 0.198           | 0.395          | 0.001           | 0.310        | 0.011           |
| ClinESSDAI                | 0.193          | 0.121           | 0.388          | 0.001           | 0.383        | 0.001           |
| ClinTrialsESSDAI          | 0.293          | 0.017           | 0.461          | <0.001          | 0.440        | <0.001          |
| OSS                       | 0.333          | 0.017           | -0.182         | 0.200           | -0.099       | 0.490           |
| tBUT                      | -0.220         | 0.120           | 0.082          | 0.569           | 0.153        | 0.282           |
| Unstimulated SFR (ml/min) | -0.281         | 0.025           | 0.061          | 0.634           | -0.039       | 0.762           |
| Stimulated SFR (ml/min)   | -0.263         | 0.037           | 0.104          | 0.419           | -0.033       | 0.797           |

|                             |        |       |        |        |        |       |
|-----------------------------|--------|-------|--------|--------|--------|-------|
| Salivary gland scintigraphy |        |       |        |        |        |       |
| PG-UR                       | -0.252 | 0.044 | 0.020  | 0.875  | -0.054 | 0.671 |
| PG-EF (%)                   | -0.227 | 0.071 | 0.136  | 0.283  | 0.097  | 0.448 |
| SMG-UR                      | -0.357 | 0.004 | -0.069 | 0.589  | -0.079 | 0.537 |
| SMG-EF (%)                  | -0.325 | 0.009 | -0.038 | 0.764  | -0.047 | 0.710 |
| Focus score                 | 0.261  | 0.050 | 0.006  | 0.962  | 0.086  | 0.525 |
| ESR                         | 0.156  | 0.210 | 0.365  | 0.003  | 0.142  | 0.256 |
| CRP                         | 0.133  | 0.289 | 0.430  | <0.001 | 0.222  | 0.073 |
| IgG                         | 0.209  | 0.097 | 0.297  | 0.018  | 0.116  | 0.363 |

ESSPRI, EULAR Sjögren's Syndrome Patient Reported Index; ESSPRI-Dryness, dryness domain of ESSPRI; ESSPRI-Fatigue, fatigue domain of ESSPRI; ESSPRI-Pain, pain domain of ESSPRI; ESS, EULAR sicca score; Ocular-VAS, visual analogue scale for ocular dryness; Oral-VAS, VAS for oral dryness; OSDI, ocular surface disease index; PGA, patient's global assessment; OSS, ocular staining score; tBUT, tear break-up time; SFR, Salivary flow rate; PG, parotid gland; UR, uptake ratio; EF, ejection fraction; SMG, submandibular gland, ESR, erythrocyte sedimentation rate; CRP, C-reactive protein.

**Supplementary Table S5. Clinical and laboratorial characteristics of patients with primary Sjögren's syndrome based on ESSPRI of 5.**

|                             | ESSPRI ≥ 5<br>(N = 32) | ESSPRI < 5<br>(N = 34) | P-value            |
|-----------------------------|------------------------|------------------------|--------------------|
| Age, years                  | 48.2 ± 10.5            | 50.2 ± 12.1            | 0.480 <sup>†</sup> |
| Disease duration            | 4.3 ± 2.8              | 5.9 ± 4.1              | 0.069              |
| ESSPRI                      |                        |                        |                    |
| ESSPRI-Dryness              | 6.9 ± 1.2              | 5.0 ± 1.7              | <0.001             |
| ESSPRI-Fatigue              | 6.6 ± 1.2              | 3.3 ± 1.4              | <0.001             |
| ESSPRI-Pain                 | 4.6 ± 2.1              | 1.6 ± 1.4              | <0.001             |
| ESS                         | 7.2 ± 1.3              | 5.3 ± 1.7              | <0.001             |
| Ocular-VAS                  | 6.1 ± 1.6              | 4.2 ± 2.2              | <0.001             |
| Oral-VAS                    | 7.7 ± 1.6              | 5.9 ± 2.3              | <0.001             |
| OSDI                        | 45.7 ± 27.2            | 37.8 ± 17.2            | 0.379              |
| PGA                         | 6.7 ± 1.5              | 4.3 ± 1.8              | <0.001             |
| ESSDAI                      | 5.8 ± 6.1              | 2.5 ± 3.2              | 0.009              |
| ClinESSDAI                  | 5.8 ± 6.9              | 2.0 ± 3.5              | 0.007              |
| ClintrialsESSDAI            | 4.5 ± 4.6              | 1.3 ± 2.0              | 0.007              |
| Schirmer's test positivity  | 29/32 (90.6)           | 23/33 (69.7)           | 0.061              |
| OSS                         | 6.9 ± 6.4              | 6.9 ± 6.2              | 0.988              |
| tBUT                        | 8.9 ± 4.1              | 8.9 ± 4.5              | 0.982              |
| Unstimulated SFR (ml/min)   | 0.02 ± 0.03            | 0.04 ± 0.08            | 0.392              |
| Stimulated SFR (ml/min)     | 0.37 ± 0.54            | 0.43 ± 0.53            | 0.682              |
| Salivary gland scintigraphy |                        |                        |                    |
| PG-UR                       | 2.5 ± 0.9              | 2.5 ± 0.9              | 0.837              |
| PG-EF (%)                   | 35.9 ± 21.1            | 39.8 ± 21.5            | 0.714              |

|                             |              |              |        |
|-----------------------------|--------------|--------------|--------|
| SMG-UR                      | 2.4 ± 0.9    | 2.4 ± 1.0    | 0.714  |
| SMG-EF (%)                  | 17.7 ± 17.5  | 22.8 ± 18.4  | 0.257  |
| Focus score                 | 2.2 ± 2.1    | 1.8 ± 1.6    | 0.448  |
| ESR elevation               | 20/32 (62.5) | 15/34 (44.1) | 0.149† |
| CRP elevation               | 5/32 (15.6)  | 0/34 (0.0)   | 0.023† |
| IgG elevation               | 22/32 (68.8) | 16/32 (50.0) | 0.203† |
| Anti-Ro antibody positivity | 24/31 (77.4) | 21/34 (61.8) | 0.191† |
| Anti-La antibody positivity | 7/31 (22.6)  | 12/34 (35.3) | 0.289† |

*P* values are obtained using the Student's *t*-test<sup>‡</sup>, Mann–Whitney U test, or Chi-squared or Fisher's exact test<sup>†</sup>. ESSPRI, EULAR Sjögren's Syndrome Patient Reported Index; ESSPRI-Dryness, dryness domain of ESSPRI; ESSPRI-Fatigue, fatigue domain of ESSPRI; ESSPRI-Pain, pain domain of ESSPRI; ESS, EULAR sicca score; Ocular-VAS, visual analogue scale for ocular dryness; Oral-VAS, VAS for oral dryness; OSDI, ocular surface disease index; PGA, patient's global assessment; OSS, ocular staining score; tBUT, tear break-up time; SFR, Salivary flow rate; PG, parotid gland; UR, uptake ratio; EF, ejection fraction; SMG, submandibular gland, ESR, erythrocyte sedimentation rate; CRP, C-reactive protein.

**Supplementary Table S6. Correlations between age or disease duration and subjective or objective measures in primary Sjögren's syndrome.**

|                             | Age          |                 | Disease duration |                 |
|-----------------------------|--------------|-----------------|------------------|-----------------|
|                             | Spearman rho | <i>P</i> -value | Spearman rho     | <i>P</i> -value |
| ESSPRI                      | -0.072       | 0.566           | -0.177           | 0.155           |
| ESSPRI-Dryness              | 0.014        | 0.913           | -0.004           | 0.977           |
| ESSPRI-Fatigue              | -0.160       | 0.200           | -0.271           | 0.028           |
| ESSPRI-Pain                 | -0.052       | 0.680           | -0.136           | 0.275           |
| ESS                         | 0.028        | 0.826           | -0.001           | 0.993           |
| Ocular-VAS                  | -0.004       | 0.972           | 0.009            | 0.946           |
| Oral-VAS                    | 0.025        | 0.841           | 0.012            | 0.924           |
| OSDI                        | -0.043       | 0.840           | 0.422            | 0.035           |
| PGA                         | 0.100        | 0.426           | 0.046            | 0.717           |
| ESSDAI                      | -0.323       | 0.008           | -0.189           | 0.128           |
| ClinESSDAI                  | -0.208       | 0.094           | -0.153           | 0.219           |
| ClinTrialsESSDAI            | -0.226       | 0.068           | -0.101           | 0.417           |
| OSS                         | -0.020       | 0.891           | 0.270            | 0.055           |
| tBUT                        | -0.037       | 0.798           | -0.276           | 0.050           |
| Unstimulated SFR (ml/min)   | -0.007       | 0.954           | -0.236           | 0.062           |
| Stimulated SFR (ml/min)     | -0.011       | 0.932           | -0.147           | 0.249           |
| Salivary gland scintigraphy |              |                 |                  |                 |

|             |        |       |        |       |
|-------------|--------|-------|--------|-------|
| PG-UR       | 0.034  | 0.790 | -0.203 | 0.108 |
| PG-EF (%)   | 0.100  | 0.432 | -0.285 | 0.022 |
| SMG-UR      | 0.097  | 0.446 | -0.004 | 0.974 |
| SMG-EF (%)  | 0.102  | 0.423 | 0.039  | 0.761 |
| Focal score | -0.130 | 0.335 | -0.091 | 0.502 |
| ESR         | -0.298 | 0.015 | -0.325 | 0.008 |
| CRP         | -0.167 | 0.181 | -0.203 | 0.103 |
| IgG         | -0.414 | 0.001 | -0.195 | 0.122 |

ESSPRI, EULAR Sjögren's Syndrome Patient Reported Index; ESSPRI-Dryness, dryness domain of ESSPRI; ESSPRI-Fatigue, fatigue domain of ESSPRI; ESSPRI-Pain, pain domain of ESSPRI; ESS, EULAR sicca score; Ocular-VAS, visual analogue scale for ocular dryness; Oral-VAS, VAS for oral dryness; OSDI, ocular surface disease index; PGA, patient's global assessment; OSS, ocular staining score; tBUT, tear break-up time; PGA, patient's global assessment; ESSDAI, EULAR Sjögren's Syndrome Disease Activity Index; ClinESSDAI, Clinical ESSDAI; ClinTrialsESSDAI, Clinical Trials ESSDAI ; OSS, ocular staining score; tBUT, tear break-up time; SFR, salivary flow rate; PG, parotid gland; UR, uptake ratio; EF, ejection fraction; SMG, submandibular gland, ESR, erythrocyte sedimentation rate; CRP, C-reactive protein.
